# Supplementary material for: Development of sensitive and selective glucose colorimetric assay using glucose oxidase immobilized on magnetite–gold–folate nanoparticles
Source: Royal Society of Chemistry journal article supplement (doi:10.1039/c6ay02850k), 2016-01-01
Supplement: c6ay02850k1.pdf [file c6ay02850k1.pdf]

## Electronic Supplementary Information

### **Development of sensitive and selective glucose colorimetric assay using glucose oxidase immobilized on magnetite-gold-folate nanoparticles**

Kitayanan Ponlakheth, Maliwan Amatatongchai\*, Wongduan Sroysee,

Purim Jarujamrus and Sanoie Chairam,

*<sup>a</sup>Department of Chemistry and Center of Excellence for Innovation in Chemistry,  
Faculty of Science, Ubon Ratchathani University,  
Ubon Ratchathani 34190, Thailand.*

To whom correspondence should be addressed. Fax: 66 4528 8379; Tel: 66 4535 3401-4 ext. 4576; E-mail:

maliwan.a@ubu.ac.th or amaliwan@gmail.com (*M. Amatatongchai*)

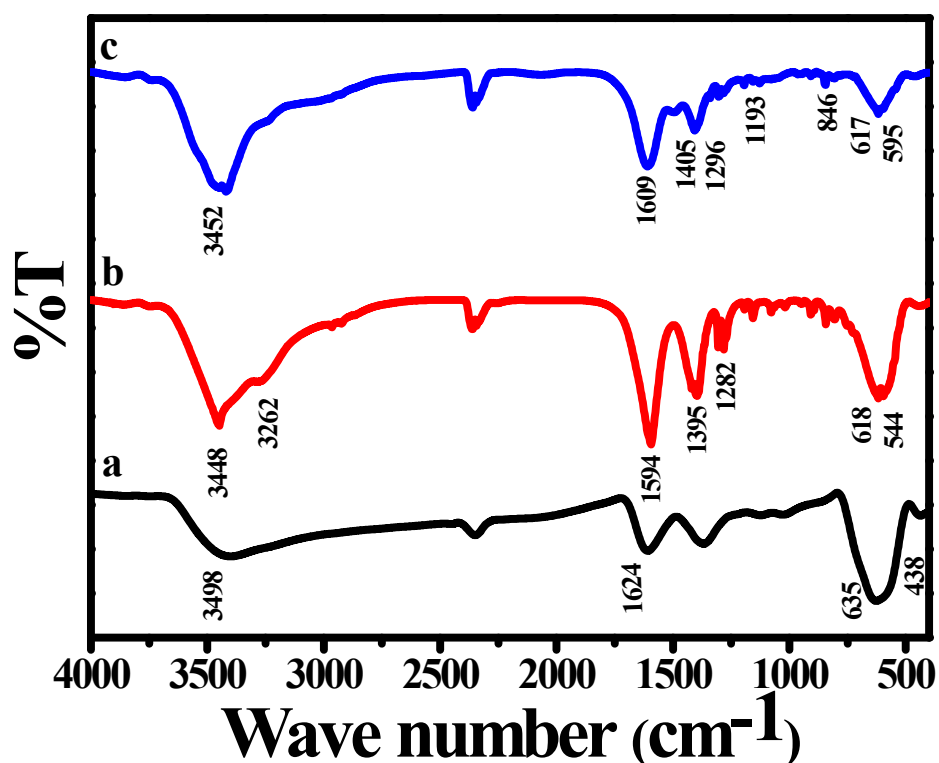

**Fig.S1.** FT-IR spectra of (a) Fe<sub>3</sub>O<sub>4</sub>, (b) Fe<sub>3</sub>O<sub>4</sub>@Au, and (c) Fe<sub>3</sub>O<sub>4</sub>@Au-Cys-FA

Fig. 1S shows the FT-IR spectra of uncoated Fe<sub>3</sub>O<sub>4</sub>, Fe<sub>3</sub>O<sub>4</sub>@Au and Fe<sub>3</sub>O<sub>4</sub>@Au-Cys-FA. For Fe<sub>3</sub>O<sub>4</sub> (Fig. 1S (a)), the bands at 3498 cm<sup>-1</sup> and 1624 cm<sup>-1</sup> are assigned to stretching and bending vibrations of OH group, respectively which due to adsorbed water on the surface of the Fe<sub>3</sub>O<sub>4</sub> nanoparticles. The spectra also show the bands at 635 cm<sup>-1</sup> and 438 cm<sup>-1</sup> correspond to the Fe-O bond vibration of Fe<sub>3</sub>O<sub>4</sub> nanoparticles. For Fe<sub>3</sub>O<sub>4</sub>@Au spectrum (Fig. 1S (b)), the observed band around 3262 cm<sup>-1</sup> and 1594 cm<sup>-1</sup> are assigned to CH<sub>2</sub> stretching and 1395 cm<sup>-1</sup> and 1282 cm<sup>-1</sup> assigned to C=O asymmetric stretching vibration from carboxylate (COO<sup>-</sup>) of citrate which indicated the successful of Au coated Fe<sub>3</sub>O<sub>4</sub> nanoparticles. Another evident for Au coated Fe<sub>3</sub>O<sub>4</sub> was observed from the shift of Fe-O stretching band of uncoated Fe<sub>3</sub>O<sub>4</sub> at 635 cm<sup>-1</sup> to 618 cm<sup>-1</sup> and the decreasing of intensity due to Au coating. The band at 3452 cm<sup>-1</sup> of Fe<sub>3</sub>O<sub>4</sub>@Au-Cys-FA (Fig. 1S (c)) is assigned to the N-H stretching vibration in -NH<sub>2</sub> and the bands around 1405 cm<sup>-1</sup> and 1609 cm<sup>-1</sup> are attributed to C-C aromatic ring stretching vibration of folic acid. These results indicate the successful coating of Cys and FA on Fe<sub>3</sub>O<sub>4</sub>@Au core. Our confirmation data of Fe<sub>3</sub>O<sub>4</sub>@Au-Cys-FA formation is consistent with previous report from Sh. Karamipour *et al*<sup>19</sup>.

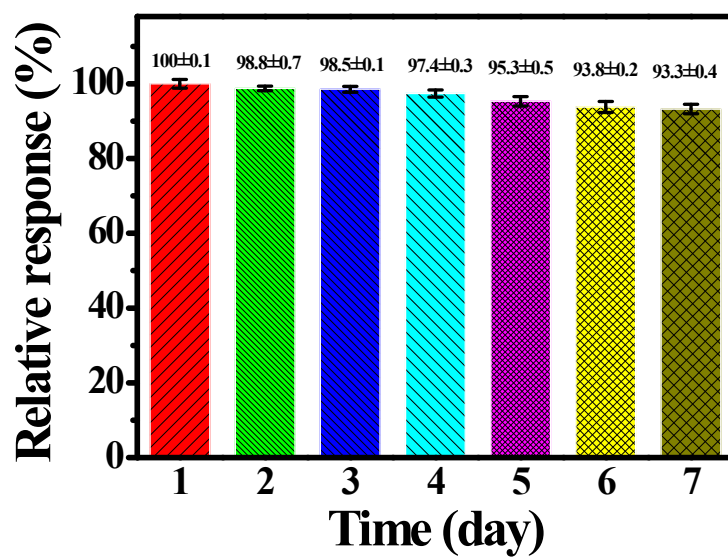

**Fig.S2.** Stability of the developed glucose detection using  $\text{Fe}_3\text{O}_4@$ Au-Cys-FA-GOx nanocomposites.

**Table S1** The hydrodynamic size and zeta potentials of nanocomposites dispersed in water at various immobilization stages.

| Nanocomposites at various immobilization stages | DLS                |                     |
|-------------------------------------------------|--------------------|---------------------|
|                                                 | Particle size (nm) | Zeta potential (mV) |
| <i>Fe<sub>3</sub>O<sub>4</sub></i>              | 182.0              | -20.3               |
| <i>Fe<sub>3</sub>O<sub>4</sub>@Au</i>           | 203.8              | -24.3               |
| <i>Fe<sub>3</sub>O<sub>4</sub>@Au-Cys-FA</i>    | 250.0              | -28.1               |
